# Supplementary material
Source: PubMed Central journal article supplement (PMC3434773)

# Supplemental Figure 1

A

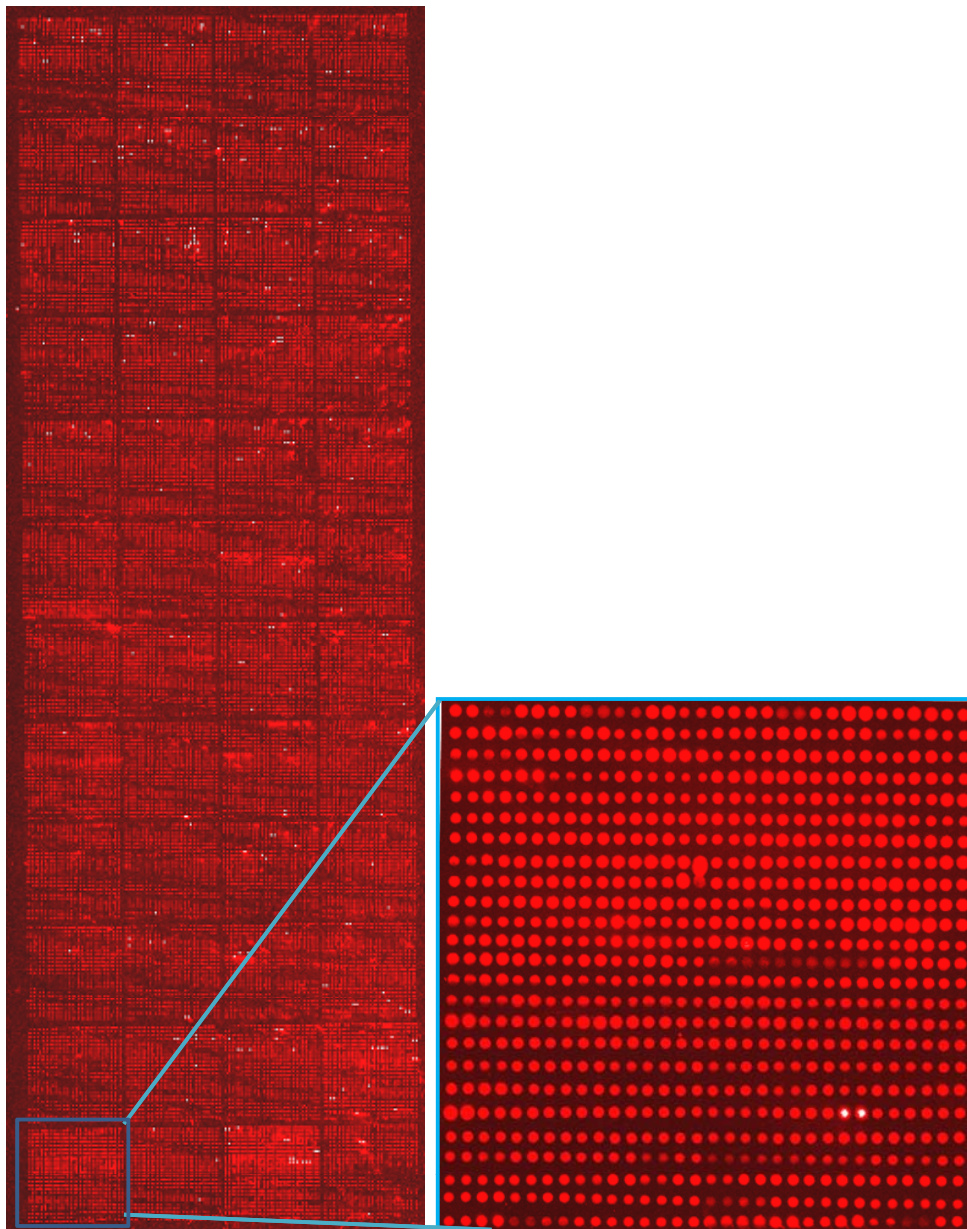

(Barcode: 2000114461)

B

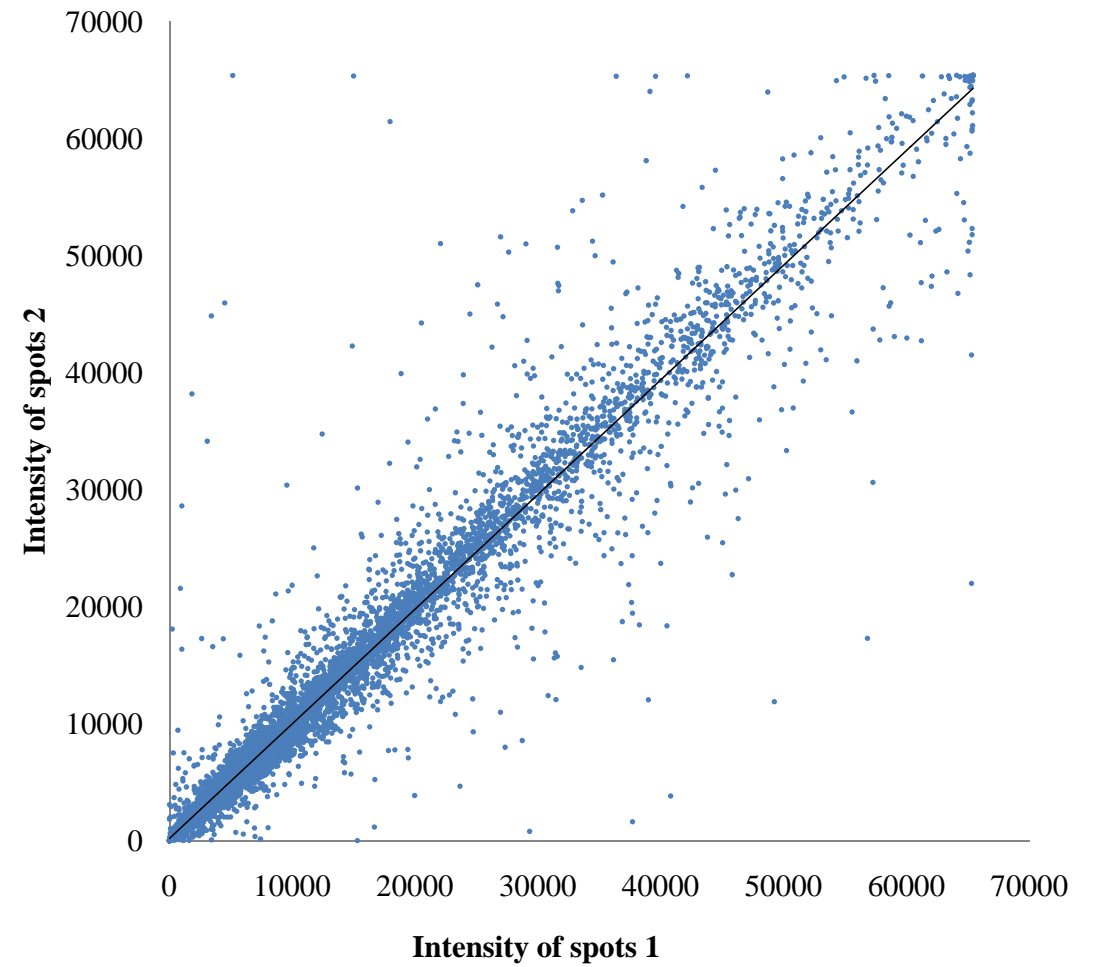

Supplement: supp_M111.015529_mcp.M111.015529-2.pdf [file supp_M111.015529_mcp.M111.015529-2.pdf]
